## Tumor specific delivery and therapy mediate by integrin $\beta 6$ -target immunoliposomes for $\beta 6$ -siRNA in colon carcinoma

Liu Song<sup>1</sup>, Zhang Fan<sup>2</sup>, Niu Jun<sup>3</sup>, Liang Benjia<sup>3</sup>, Li Zequn<sup>3</sup>, Wang Xilong<sup>1</sup>, Jia Zhongming<sup>1</sup>, Han yong<sup>1</sup>, Wang Xiaohong<sup>1</sup>, Cheng Kai<sup>1</sup>, Yang Zhenlin<sup>1</sup>

<sup>1</sup>Department of Thyroid & Breast Surgery, Binzhou Medical College Affiliated Hospital, Binzhou 256600, Shandong, PR China

<sup>2</sup>Department of Oncology, Binzhou Medical College Affiliated Hospital, Binzhou 256600, Shandong, PR China

<sup>3</sup>Department of Hepatobiliary Surgery, Qilu Hospital of Shandong University, Jinan 250012, Shandong, PR China

Correspondence to: Yang Zhenlin, email: yzhlin@126.com

Keywords: colon carcinoma, integrin $\beta 6$ , target therapy, immunoliposomes, siRNA

Received: June 06, 2016

Accepted: October 21, 2016

Published: November 08, 2016

### ABSTRACT

**Adjuvant chemotherapy does not achieve the desired therapeutic efficacy in colon cancer as a result of the deficient reaction. Gene therapy using small interfering RNAs (siRNAs) delivered by target delivering system represents a potent and specific strategy in tumor therapy. Integrin $\beta 6$  is exclusively expressed in malignant colonic epithelia, associated with the progression, metastasis, and chemotherapeutic resistance of colon cancer. Accordingly, designing an efficient and targeted delivery system for  $\beta 6$ -siRNA could be a potential approach to improve therapeutic efficacy of colon cancer. Here, we designed the Integrin $\beta 6$  target immunoliposomes for highly efficient and selective delivery of  $\beta 6$ -siRNA in colon cancer, which consequently resulted in greatly growth suppression, invasion and metastasis of colon cancer cells. Moreover, it was able to greatly inhibit the tumor growing in vivo.**

### INTRODUCTION

Colon cancer is the third most common cancer and the fourth leading cause of cancer-related deaths worldwide. Each year, more than 1.2 million people are diagnosed with colon cancer, and even more than 600,000 die from the disease [1]. Although surgery remains the preferred treatment, adjuvant chemotherapy is the conventional care for patients with metastasis to palliate symptoms and reduce mortality [2, 3]. However, because of the subsequent chemo-resistance, the five-year survival rate of these cases remains low. Therefore, it is urgent to explore alternative and effective strategies for colon cancer treatment.

Gene therapy using small interfering RNAs (siRNAs) represents a potent and specific strategy in tumor therapy. The siRNAs are 21-25 nucleotide (nt), double-stranded RNAs and finding increasing applications due to their role of transcript degradation for silencing tumor-specific genes and easy design strategies [4]. However, as a negative-charged and water-soluble macro molecule, application of free siRNAs faces many barriers such as ribonuclease (RNase) degradation, poor permeability and sub-optimal bioavailability, which impede the clinical

success of siRNAs therapeutics [5]. Among the existing arsenal of siRNAs delivery reagents, lipid-based delivery systems, such as liposomes, prove to be effective vectors of choice for systemic siRNAs delivery in tumor therapy [6]. Moreover, the short circulation lifetime of liposomes could be overcome by attaching polymeric PEG on the surface [7, 8].

Nevertheless, PEGylation represents a major disadvantage for nucleic acid internalization and endosomal escape, which leads to greatly reduced transfection efficiency. In addition, these liposomes passively interact with targeted cells, in vitro or in vivo, resulting in nonspecific siRNAs release [9]. Therefore, to further improve the transfection efficiency of PEGylated liposomes, it is a practical way to develop immunoliposomes conjugated with targeting ligands [10, 11].

Integrin $\beta 6$  is a subtype of integrin that is expressed exclusively on the surfaces of epithelial cells and is a receptor for extracellular matrix proteins. Integrin $\beta 6$  expression is upregulated during embryogenesis, oncogenesis and epithelial repair, whereas it is generally undetectable in healthy epithelial tissues [12, 13]. In colon cancer, integrin $\beta 6$  is specifically expressed in

tumor tissues and is rarely present in tissues adjacent to the tumor. In addition, integrin $\beta$ 6 is associated with colon cancer pathology, malignancy, and TNM stage and could act as a prognostic indicator in aggressive colon carcinomas [14, 15]. Our research previously confirmed that integrin $\beta$ 6 contributed to chemotherapeutic resistance in colon cancer. Unsurprisingly, the exclusive expression of integrin  $\beta$ 6 and its influential effects in colon cancer make it a novel therapeutic target for colon cancer treatment [16, 17].

We have previously developed integrin $\beta$ 6-targeted immunoliposomes (TLPs) which could provide a highly efficient approach for targeted drug delivery and enhance the antitumor efficiency in colon cancer [18]. However, research concerning integrin $\beta$ 6-targeted immunoliposomes used for siRNAs delivery has not been reported. In the current study, we use integrin $\beta$ 6-targeted immunoliposomes as a siRNAs delivery system, and explore their transfection efficiency in colon cancer cells. Since we have previously confirmed that suppression of integrin $\beta$ 6 by siRNAs inhibited cell growth and invasion in colon cancer cells, in this study, we additionally study the effects of integrin $\beta$ 6-targeted immunoliposomes on cell death and migration/invasion in colon cancer when delivering the  $\beta$ 6-siRNA.

## RESULTS

### Preparation and characterization of $\beta$ 6-targeted immunoliposomes

Integrin $\beta$ 6-TLPs were successfully synthesized in our study as previously described [18]. The mean particle size of the TLPs was  $385.3 \pm 4.85$  nm. The zeta potential was  $-7.65 \pm 1.12$  mV. After siRNA was loaded,  $\beta$ 6-TLPs were still spherical or ellipsoidal, as shown directly by TEM (Figure 1A). Size distribution of  $\beta$ 6-siRNA loaded TLPs was shown in Figure 1B, and the mean particle size was  $396.1 \pm 2.16$  nm, which was slightly greater than that of free TLPs. These indicated that the load of siRNA has no significant impact on immunoliposomes size which played great role in circulation time and cellular uptake efficiency. The zeta potential of the siRNA loaded TLPs was also investigated. When loading with siRNA, the zeta potential of TLPs decreased to a value of  $-14.18 \pm 1.74$  mV.

In addition, the ultra-filtrating method was used to calculate the siRNA encapsulation efficiencies (EE%) of both non-target liposomes (NLPs) and TLPs. The siRNA EE% of both liposomes was  $85.43\% \pm 2.03\%$  and  $87.54\% \pm 1.32\%$ , respectively, suggesting that antibody conjugation have little adverse impact on siRNA EE%.

Furthermore, we detected the siRNA serum stability in order to confirm whether siRNA in liposomes were stable to digestion by nuclease in serum for transfection activity in cells [19]. In this study, we tested the stability

of siRNA in Lipo2000, NLPs and TLPs formulations by incubating siRNA loaded liposomes with an equal volume of serum and incubated at 37°C. As shown in Figure 1C, free siRNA started to degrade after 3 h and was completely degraded after 6 h. However, siRNA in Lipo2000 started to degrade after 6 h and fully degraded even after 12 h. In contrast, siRNA fully degradation in both NLPs and TLPs happened after 24 h, which indicated that NLPs and TLPs equally protected siRNA from serum degradation to a great extent.

### In vitro cellular uptake and transfection efficiency of $\beta$ 6-targeted immunoliposomes

In order to analyze the transfection efficiency of  $\beta$ 6-targeted immunoliposomes, we examined the in vitro cellular uptake of siRNA encapsulated in liposomes. Colon cancer cells HT-29, WiDr and SW480 were treated with FAM-siRNA loaded Lipo2000, NLPs and TLPs for 24 h and 48 h. Under a fluorescence microscope, the green fluorescence of the FAM-labeled siRNA was visualized. As shown in Figure 2A and 2B, siRNA in the liposomes were all successfully taken up by HT-29 and WiDr cells, and obviously increased from 24h to 48h. The siRNA in TLPs had a higher cellular uptake than both Lipo2000 and NLPs in 24 hours. However, there was no significant difference among these three liposomes formulations at 48 hours after treatment. However, when treated on SW480 cells which had no integrin  $\beta$ 6 expression, TLPs has a similar cellular uptake of siRNA with NLPs and Lipo2000 in 24 h.

Flow cytometry was used to further quantify the cellular uptake amount of siRNA (Figure 2C and 2D). Slight fluorescence was detected in HT-29 and WiDr cells treated with FAM-siRNA encapsulated in Lipo2000 and NLPs at 24 h point, whereas much higher fluorescence intensities were measured in both cell lines treated with TLPs loaded with FAM-siRNA. However, there was no significant different among TLPs, NLPs and Lipo2000 on SW480 cells. As time went to 48 hours, the difference began to narrow in these three groups. All above results indicated that TLPs might be able to promote the cellular uptake of siRNA in  $\beta$ 6-expressing colon cancer cells, which probably resulted in improved  $\beta$ 6 gene silencing. Moreover, the decreased cellular uptake of TLPs on SW480 cells that expressed negative  $\beta$ 6 may testify the specific cell binding of TLPs.

### Integrin $\beta$ 6 gene silencing in colon cancer cells

We have reported that integrin $\beta$ 6 played a significant role in cell growth, invasion, and metastasis of colon cancer which were able to be inhibited by suppression of integrin $\beta$ 6 expression [20-22]. Therefore, finding an effective and integrin $\beta$ 6 targeted method to suppress the  $\beta$ 6 expression might be provide a potential

way for therapy of colon cancer. In order to examine the efficiency of  $\beta 6$  gene silencing of TLPs, we detected the  $\beta 6$  expression in HT-29 and WiDr cell lines treated with  $\beta 6$ -siRNA encapsulated in Lipo2000, NTLPs and TLPs in RNA level by PCR. As shown in Figure 3A, all the siRNA liposomal complex could decrease the expression of  $\beta 6$ . However, comparing with Lipo2000 and NTLPs, the  $\beta 6$  mRNA expression in both cells lines was greatly reduced in TLPs group which suggested that TLPs could promote the expression suppression of  $\beta 6$ -siRNA. However, there was no obvious difference between Lipo2000 and NTLPs, which indicated that PEGylated liposomes were not able to increase the transfection efficiency of siRNA in vitro.

In addition, we examined the integrin $\beta 6$  protein expression by western blotting. HT-29 and WiDr were treated as described above. It was also notable to see in Figure 3B that  $\beta 6$ -siRNA in TLPs was more likely

to inhibit the  $\beta 6$  expression than both Lipo2000 and NTLPs. In consistence with the result of PCR, Lipo2000 and NTLPs had an equal activation of  $\beta 6$  expression suppression. The  $\beta 6$  scrambled siRNA in TLPs had no effects on the expression of integrin $\beta 6$ .

### Cell viability

Our previous study showed that  $\beta 6$ -siRNA was able to suppress the growth of colon cancer cells. To explore whether  $\beta 6$ -TLPs could improve the effect on tumor suppression of  $\beta 6$ -siRNA, HT-29 and WiDr cells were exposed to  $\beta 6$ -siRNA in Lipo2000, NTLPs and TLPs three liposomal formulations, with  $\beta 6$ -siRNA at different concentrations (50nM, 100nM and 200 nM). The  $\beta 6$  scrambled siRNA in TLPs were used as controls. The cytotoxicity and growth inhibition of the cells was then

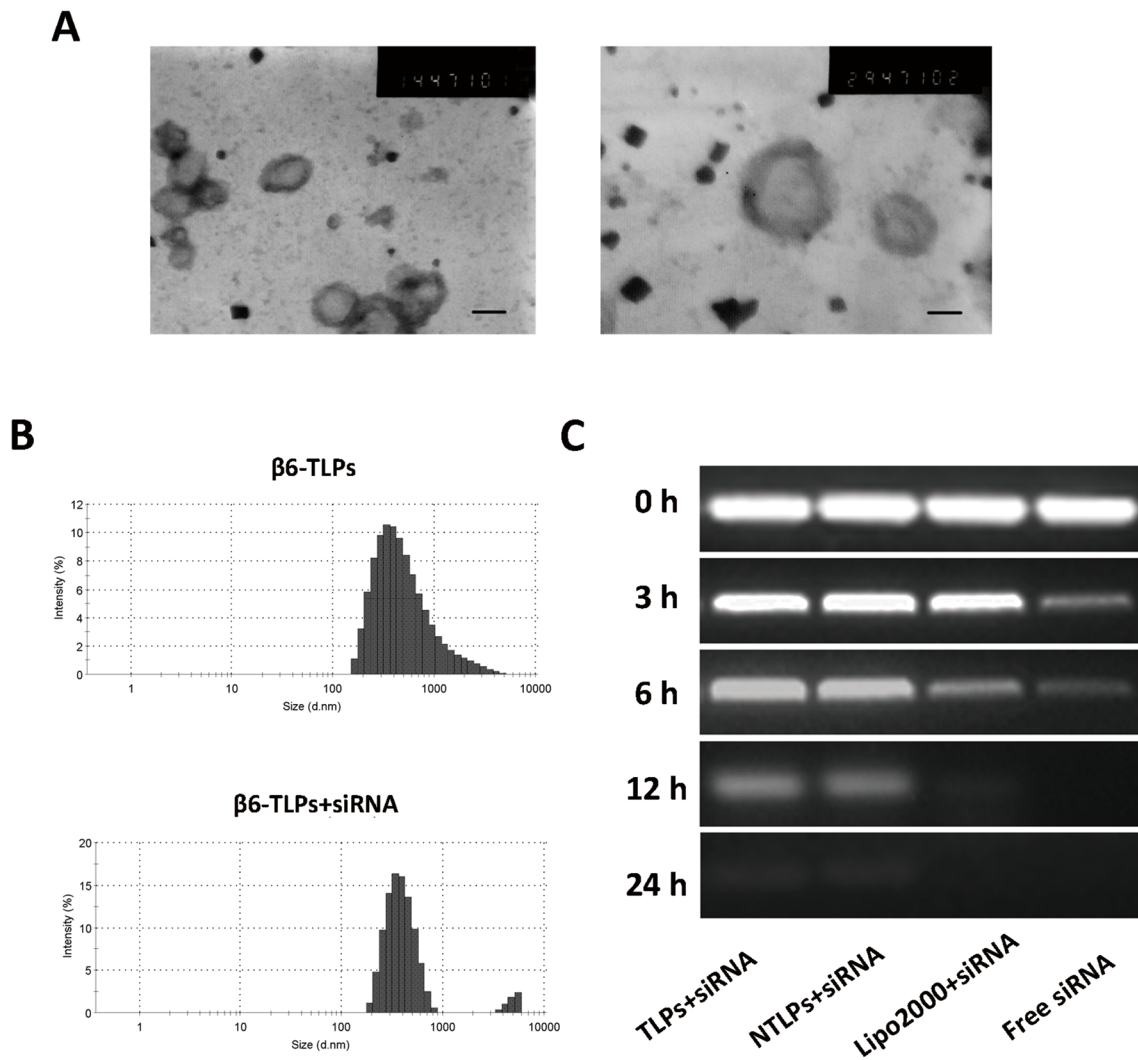

**Figure 1:** **A.** Transmission electron photomicrograms of  $\beta 6$ -siRNA loaded TLPs. Bar = 200nm and 100nm. **B.** Typical particle size and distribution of  $\beta 6$ -TLPs and  $\beta 6$ -TLPs loaded with siRNA. **C.** siRNA serum stability assay. Samples of siRNA in aqueous solution or in liposomes were mixed with fresh serum at a 1:1 volume ratio. Each sample containing 0.25  $\mu$ g siRNA were added onto a gel and electrophoresis was performed to visualize intact siRNA at different fixed times.

evaluated by the CCK-8 assay. As shown in Figure 3C, the cell growth was notably suppressed by the  $\beta 6$ -siRNA loaded in all three liposomal formulations at each dose for 48 hours. However, TLPs had the lowest cell viability ( $P < 0.05$ ), while the NTLPs did not induce a marked growth suppression effect compared with the Lipo2000.

Moreover, the TLPs demonstrated a clear  $\beta 6$ -siRNA dose- and time-dependent cytotoxicity in the experimental cell lines (Figure 3D). All these results suggested that the  $\beta 6$ -TLPs enhanced the cell growth suppression of  $\beta 6$ -siRNA in colon cancer cells, which probably resulted from the more effective delivery and cellular uptake of TLPs.

### $\beta 6$ -siRNA TLPs induce apoptosis of colon cancer cells

The integrin $\beta 6$  could promote the cell growth and protect cell apoptosis of colon cancer [16]. Therefore, to investigate the effect of the  $\beta 6$ -siRNA which delivered by  $\beta 6$ -TLPs on cell apoptosis, HT-29 and WiDr cells were transfected Lipo2000, NTLPs and TLPs entrapping  $\beta 6$ -siRNA with the final siRNA concentration 100nM. Subsequently, the cellular apoptotic rate was analyzed

through Annexin V-FITC and PI double staining using flow cytometry. The apoptotic rates induced by  $\beta 6$ -TLPs (HT-29 17.74%; WiDr 24.64%) were notably increased in comparison with those of Lipo2000 and NTLPs ( $P < 0.05$ ; Figure 4A and 4B). However, NTLPs presented similar  $\beta 6$ -siRNA induced cell apoptosis with Lipo2000. These findings indicated that the TLPs could improve the cell apoptosis due to the promoted transfection of  $\beta 6$ -siRNA.

To further explore the potential molecular mechanisms by which the  $\beta 6$ -siRNA loaded  $\beta 6$ -TLPs induce cell apoptosis, HT-29 and WiDr cells were grouped and treated as described in the section above, and apoptosis-related proteins were detected by Western blotting (Figure 4C and 4D). The results showed that the expression of cleaved caspase-3 and Bax were all increased in the treatment groups in both HT-29 and WiDr cells. However, TLPs group had a higher level of caspase-3 and Bax expression than Lipo2000 and NTLPs. Additionally, the protein levels of Bcl-2 and Survivin were reduced in all the mentioned groups, while  $\beta 6$ -siRNA in TLPs was more likely to lower the expression. However, there were no significant differences between the Lipo2000 and NTLPs groups.

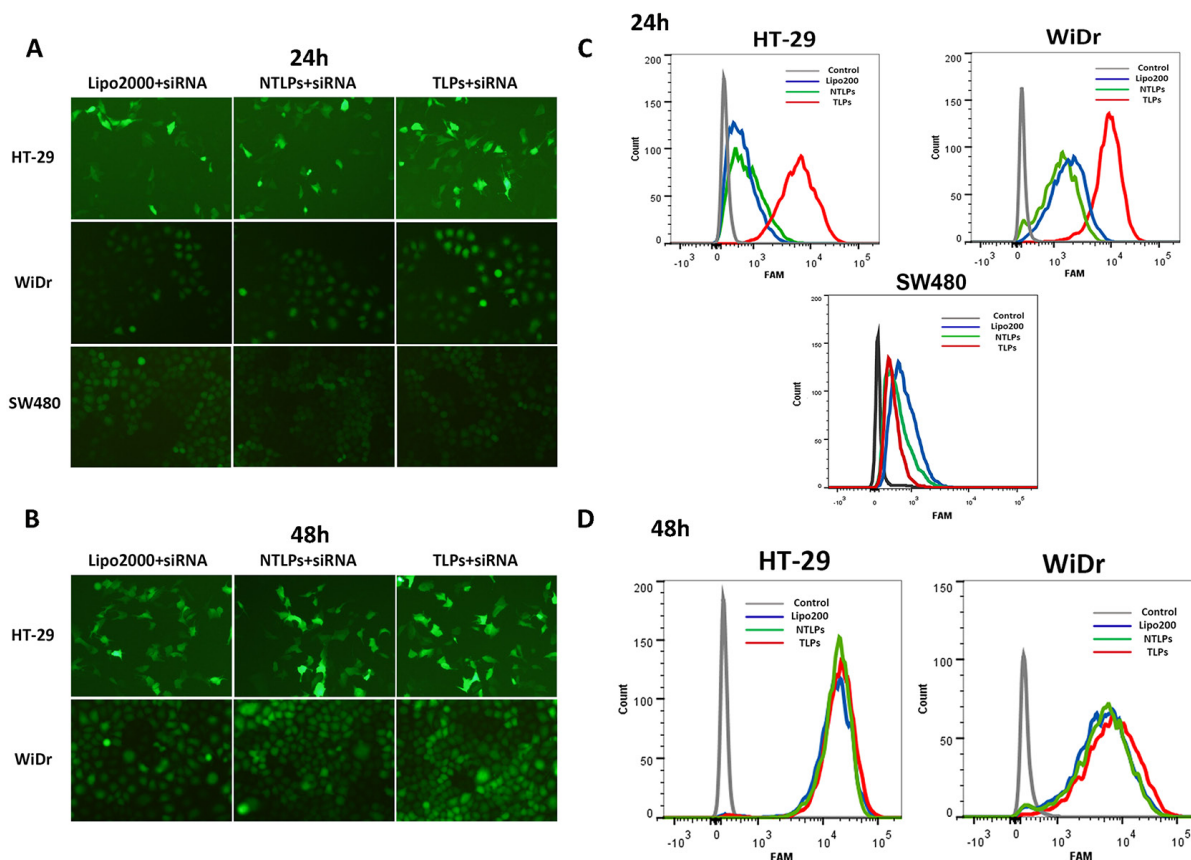

**Figure 2: Uptake of siRNA liposomal complexes in colon cancer cells.** A and B. Fluorescent micrographs of HT-29, WiDr and SW480 cells transfected with FAM-siRNA loaded Lipo2000, NLPs and TLPs with the final siRNA concentration of 100 nM at 24 and 48 hours post transfection. C and D. Cellular uptake of siRNA were also evaluated by flowcytometry.

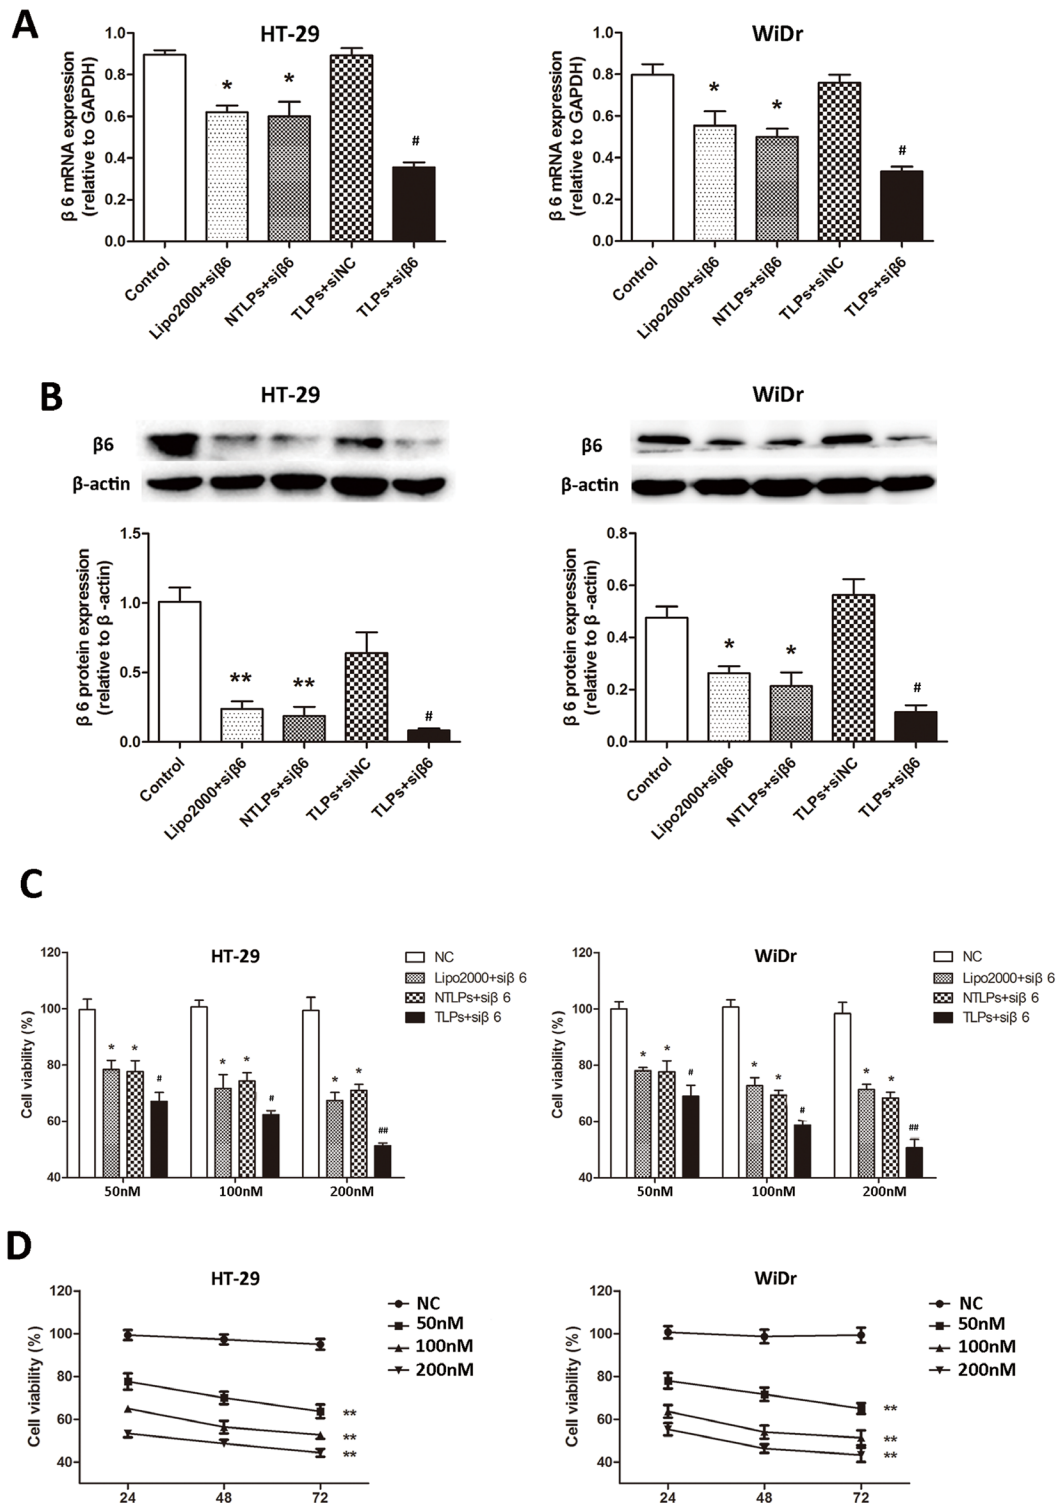

**Figure 3:** A. The mRNA expression of integrinβ6 in HT-29 and WiDr colon cancer cell lines was examined by quantitative realtime PCR. β6-siRNA transfected with TLPs had a greater suppression of β6 expression in both cell lines. B. Western blot analysis of integrinβ6 protein expression. The relative protein levels were expressed as the ratio of β-actin. The data are expressed as the means ± SD of three independent experiments, \* P < 0.05, \*\* P < 0.01 compared with control, # P < 0.05 compared with NTLPs. C. Growth inhibition in cells was evaluated by the CCK-8 assay. HT-29 and WiDr cells were treated with negative agents (negative control, NC), β6-siRNA loaded Lipo2000, NTLPs and TLPs at different concentrations (50, 100 and 200 nM). At 48 hours after treatment, the CCK-8 assay was performed. D. Both cells were transfected with serial concentrations of β6-siRNA-TLPs (50, 100 and 100 nM), and cell viability was assessed at 24, 48 and 72hours. The data are expressed as the means ± SD of three independent experiments, \* P < 0.05, \*\* P < 0.01 compared with control, # P < 0.05, ## P < 0.01 compared with NTLPs.

## β6-siRNA TLPs inhibit colon cancer cell migration and invasion

We have previously found that integrinβ6 was able to induce the migration and invasion of colon cancer cells by up-regulation of MMP-3/MMP-9 [23, 24]. In the meantime, the migration and invasion of colon cancer cells could be suppressed by β6-siRNA. In this study, in order to determine whether β6-TLPs could promote the suppression efficiency of β6-siRNA on migration and invasion of colon cancer cells, transwell assay was used to examine the migration and invasion with the membrane without (migration) Matrigel or pre-coated with (invasion). As shown in Figure 5A, β6-siRNA delivered in TLPs greatly decreased the migration of both HT-29 and WiDr cell lines in comparison with Lipo2000 and NTLPs ( $P < 0.01$ ). Meanwhile, the invasive ability of HT-29 and WiDr cells was dramatically inhibited in TLPs group (Figure 5B) ( $P < 0.01$ ). Although β6-siRNA in Lipo2000 and NTLPs were both able to suppress the migration and invasion of these two cell lines, there was no obvious differences between these liposomal formulations. Moreover, we also detected the MMP-3 and MMP-9 expression level by ELISA. As shown in Figure 5C and 5D, β6-siRNA encapsulated in TLPs was more likely to inhibit the activation of MMP-3 and MMP-9 than Lipo2000 and

NTLPs ( $P < 0.01$ ), which possibly resulted in the higher suppression of migration and invasion of colon cancer cells.

## Tumor growth inhibition of β6-siRNA TLPs in vivo

To evaluate the siRNA anti-tumor efficacy of β6-TLPs in vivo, β6-siRNA loaded in Lipo2000, NTLPs and TLPs at the dose of siRNA 0.4 mg/kg was intratumorally injected in mice bearing HT-29 human colon cancer cell xenografts. The antitumor effect, indicated by tumor growth, was shown in Figure 6A and 6B. All treatments obviously suppressed tumor growth during the treatment period ( $P < 0.05$ ). No antitumor effects were observed in the N.S. Moreover, the tumor suppression of β6-TLPs was significantly stronger than Lipo2000 and NTLPs ( $P < 0.05$ ), while the NTLPs had a higher tumor suppression than Lipo2000 ( $P < 0.05$ ). Consistent with the above result, the average tumor weight in mice treated with β6-siRNA loaded in TLPs was approximately 2-fold lower than that in mice treated with β6-siRNA loaded in NTLPs ( $P < 0.05$ ; Figure 6C).

Moreover, in order to furtherly testify the tumor-specificity of the β6-TLPs, β6-siRNA in three different liposomes was intravenously injected in the same HT-29 human colon cancer model. As shown in Figure 7A

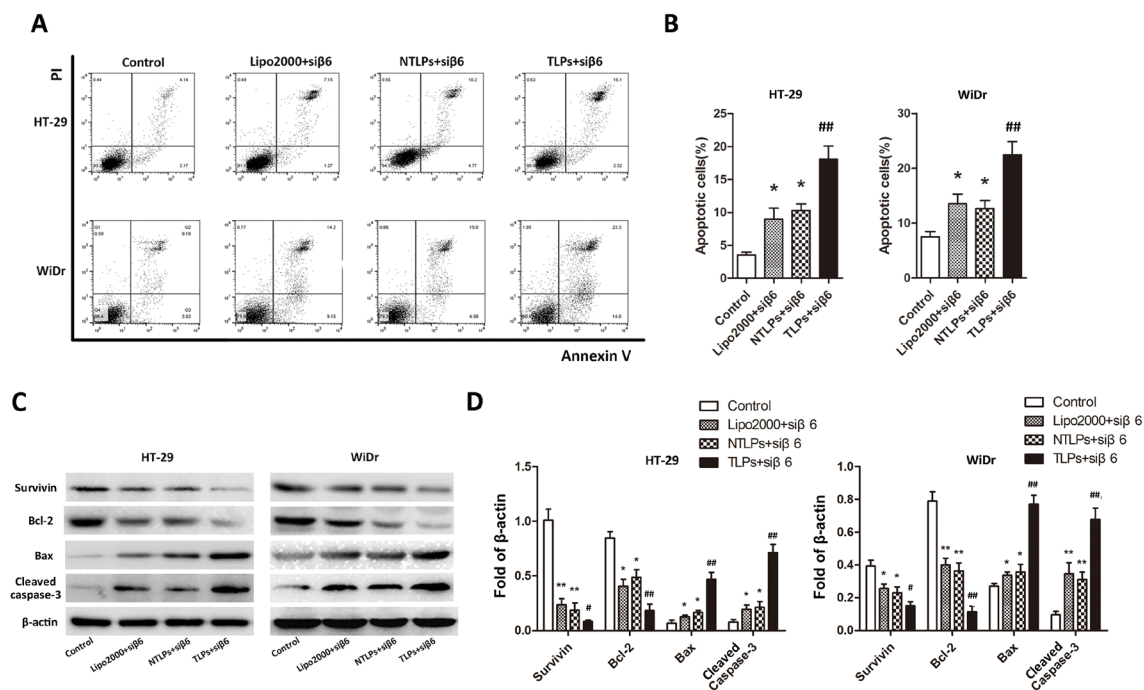

**Figure 4: Efficacy of β6-siRNA-TLPs on the apoptosis of colon cancer cells.** A. HT-29 and WiDr cells were treated with negative agents (negative control, NC), β6-siRNA loaded Lipo2000, NTLPs and TLPs. Cell apoptosis was detected by Annexin V-FITC/PI double-staining assay with flow cytometry. B. Quantification of apoptosis were also showed. C. Western blot assays showed that β6-siRNA loaded in TLPs led to a distinct up-regulation of Bax and cleaved caspase-3 and down-regulation of Bcl-2, pro-caspase-3 and Survivin. D. Quantification of expression were also showed. The data are expressed as the means ± SD of three independent experiments, \*  $P < 0.05$ , \*\*  $P < 0.01$  compared with control, #  $P < 0.05$ , ##  $P < 0.01$  compared with NTLPs.

and 7B, the tumor growth is significantly suppressed in  $\beta 6$ -TLPs group in comparison with Lipo2000 and NTLPs, which was consistent with the result of  $\beta 6$ -TLPs intratumorally injection ( $P < 0.05$ ). However, there was no obvious difference between Lipo2000 and NTLPs groups. These results may indicate that the improved anti-tumor efficiency of TLPs could contribute to the specific binding and higher delivery efficiency of TLPs. Meanwhile,  $\beta 6$  expression was greatly reduced in TLPs groups (Figure 7D and 7E). The expression of apoptosis related proteins of the tumor tissues was also detected in order to explore the potential mechanisms. As shown in Figure 7D and 7E, TLPs group had a higher level of expression of cleaved caspase-3 and Bax and lower level of Bcl-2 and Survivin.

## DISCUSSION

Like all the other targeting antigens having been already widely exploited, integrin $\beta 6$  also holds the basic characteristic as a target for target therapy in tumors that is abundant expression in solid tumors and limited expression in normal epithelial tissues [14]. Beyond that, integrin $\beta 6$  has its own special tumor-related properties which make it an ideal targeting receptor for tumor therapy, especially for colon cancer. We have previously reported that integrin $\beta 6$  was associated with the malignancy of colon cancer and it would act as an indicator for inclination of metastasis and poor prognosis [15]. Integrin $\beta 6$  remained

high level at the invasive edges between aggressive tumor site and surrounding tissues, and also up-regulated its own expression when cancer cells becoming dense [25]. Moreover, integrin $\beta 6$  had the endocytosis and recycling procedure which promote colon cancer cell migration [26]. Therefore, there is no doubt that integrin $\beta 6$  emerges as an attractive new candidate as a therapeutic target which will definitely improve therapeutic efficacy on colon carcinoma.

Based on the important role the integrin  $\beta 6$  played in colon cancer, in the current study we developed the  $\beta 6$ -targeted immunoliposomes loaded with  $\beta 6$ -siRNA which could not only increase the cellular internalization of siRNA in  $\beta 6$ -positive colon cancer cells, but also suppress the cancer by silencing the integrin $\beta 6$  expression. As what we found in this study, TLPs which targeted integrin  $\beta 6$  was able to increase the cellular internalization of siRNA on  $\beta 6$  expressing colon cancer cells. And the liposome-cell binding was integrin  $\beta 6$  specific because the cellular uptake of siRNA would vanish if there was no  $\beta 6$  expression on the cell surface (Figure 2A and 2B). Additionally, TLPs only promoted the siRNA internalization at the early stage (24h) and all the three liposomes finally had the equal volume of siRNA in the cells at 48h. This might suggest that TLPs increased the efficiency of the siRNA cellular internalization instead of the total number of the siRNA. Then the expression of the integrin  $\beta 6$  in both mRNA and protein level were detected

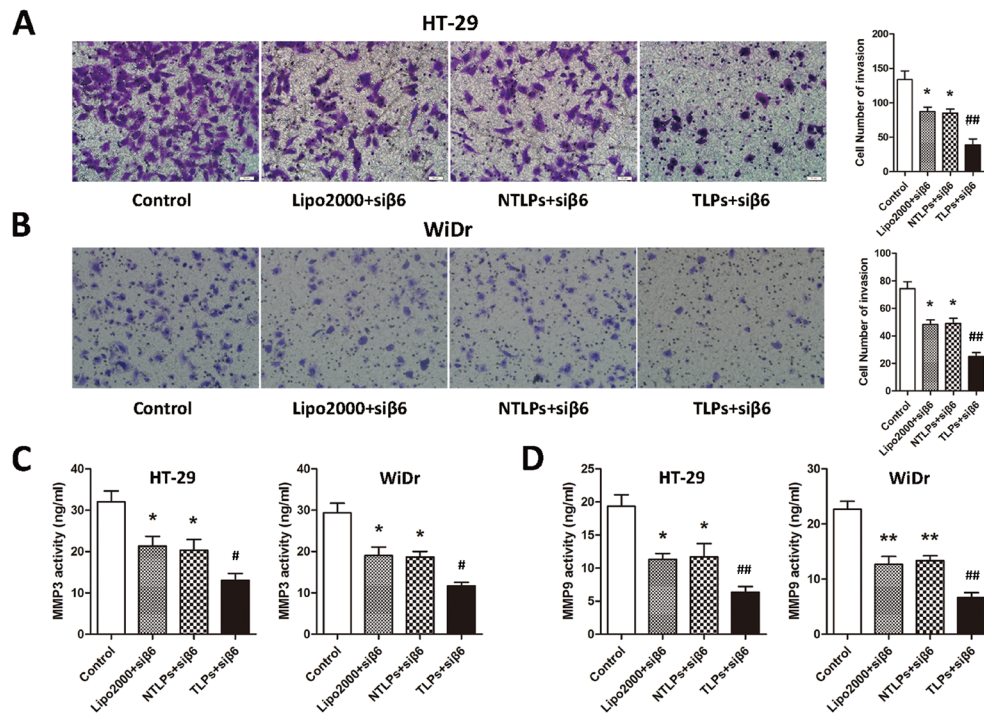

**Figure 5: A and B.** Effects on tumor cell migration and invasion ability were analyzed with Transwell assay. In comparison with Lipo2000 and NTLPs, TLPs was able to improve the  $\beta 6$ -siRNA suppression on cell migration and invasion of both HT-29 and WiDr cell lines. Meanwhile, TLPs loaded with  $\beta 6$ -siRNA could decrease the activity of MMP3 and MMP9 in HT-29 and WiDr cell lines. **C and D.** \*  $P < 0.05$ , \*\*  $P < 0.01$  compared with control, #  $P < 0.05$ , ##  $P < 0.01$  compared with NTLPs.

to confirm whether the improved cellular internalization of TLPs could lead to the down-regulation of  $\beta 6$  expression. Obviously,  $\beta 6$ -siRNA delivered in TLPs was more likely to enhance the efficiency of  $\beta 6$  gene silencing in colon cancer cells compared with non-target liposomal formulations (Figure 3A and 3B).

In our previous studies, down regulation of integrin $\beta 6$  expression by using  $\beta 6$ -siRNA could suppress the cell viability and promote apoptosis of colon cancer cells. Accordingly, we speculate that the TLPs which enhanced the  $\beta 6$ -siRNA cellular uptake and  $\beta 6$  gene silencing could possibly result in more obvious inhibition of colon cancer cell progression. As shown in Figure 3C and 3D, TLPs

was proved to raise up the suppression of cell viability in comparison with NTLPs and lipo2000. In the same time, TLPs also accelerated the apoptosis of colon cancer cells (Figure 4A and 4B). Integrin $\beta 6$  was reported to inhibit apoptosis of colon cancer cells through regulating the expression of apoptosis associated proteins [16]. In this study, we found significantly elevated expression of Bax and cleaved Caspase-3 but reduced expression of Bcl-2 and Survivin in the  $\beta 6$  siRNA-TLPs group (Figure 4C). These data suggest that the TLPs accelerate the  $\beta 6$ -siRNA induced apoptosis of colon cancer cells by increase the expression of apoptosis promoting proteins and decrease

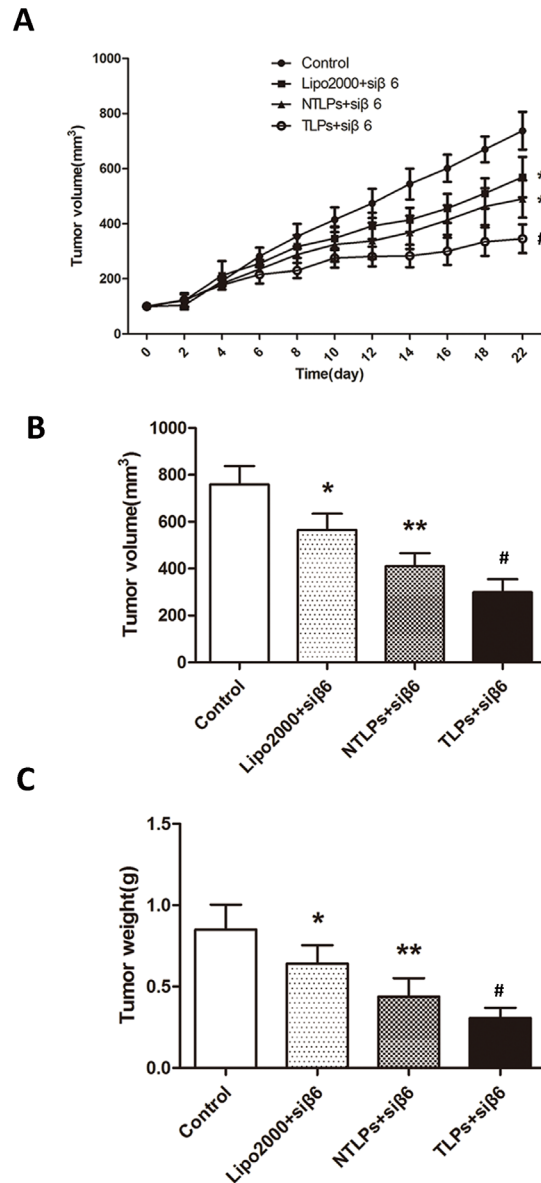

**Figure 6: In vivo anti-tumor study of liposomes in HT-29 tumor-bearing nude mice after intratumor injection with  $\beta 6$ -siRNA loaded Lipo2000, NTLPs and TLPs. The dosage  $\beta 6$ -siRNA was 0.4 mg/kg. A. Relative tumor volume time curve (n=5), \*P < 0.05 compared with control, # P < 0.05 compared with NTLPs. B and C. After 3 weeks, the mice were sacrificed and the tumors were dislodged. Tumors were also measured and weighed. (n=5), \* P < 0.05, \*\* P < 0.01 compared with control, # P < 0.05 compared with NTLPs.**



anti-apoptosis proteins in process of accelerating apoptosis of colon cancer cells.

Matrix metalloproteinases (MMPs) played fundamental roles in pathological processes through degradation of basal membranes and extracellular matrix, and some MMPs contributed to tumor invasion and metastasis [27, 28]. We have validated that integrin $\beta$ 6 promoted the invasion, metastasis and degradation of extracellular matrix of colorectal cancer, thyroid carcinoma, gastric carcinoma, and pancreatic carcinoma through up-regulation of MMP-3/MMP-9 [29-31]. In this study, we explored the effects of  $\beta$ 6-TLPs on the inhibition of colon cancer cell invasion and metastasis when delivering  $\beta$ 6-siRNA. The  $\beta$ 6-TLPs was able to prompt the effect of  $\beta$ 6-siRNA on suppression the invasion and metastasis of HT-29 and WiDr colon cancer cells. Meanwhile,  $\beta$ 6 siRNA-TLPs more significantly decreased the MMP-3/MMP-9 activity. These data suggested that  $\beta$ 6-siRNA delivered in  $\beta$ 6-TLPs was more likely to prevent the invasion and metastasis of colon cancer through inhibition of MMP-3/MMP-9 activity.

These promising in vitro results were further evaluated in vivo. The antitumor efficacy of  $\beta$ 6-TLPs was significantly superior to that of both NTLPs and

Lipo2000 when delivering  $\beta$ 6-siRNA, which was probably caused by increased cellular internalization of  $\beta$ 6-TLPs in tumor tissues. The nontargeted liposomes like NTLPs and Lipo2000 passively interact with the tumor cells, eventually resulting in the delivery of the majority of siRNA into some normal tissues or cells rather than the tumor [32]. Moreover, TLPs still had a higher suppressive of the tumor growth when intravenous injection, which suggested that the TLPs could increase the  $\beta$ 6-siRNA accumulation in tumor tissues. In conclusion, the TLPs inhibit the tumor in vivo not only by increasing the  $\beta$ 6-siRNA cellular uptake on tumor cells, but also enhancing the  $\beta$ 6-siRNA accumulation in tumor tissues.

In summary, this study successfully described a targeted delivery system for highly efficient and selective delivery of siRNA in colon cancer overexpressing integrin $\beta$ 6 and protect the integrity of the siRNA from degradation and increase the cellular uptake efficiency in vitro. Consequently, the  $\beta$ 6-TLPs resulted in greatly growth suppression and induction of apoptotic, when delivering  $\beta$ 6-siRNA to integrin $\beta$ 6 overexpressing colon cancer cells. We also observed an inhibited cell invasion of this system. Moreover, it could obviously suppress the tumor growing in vivo. Taken together, the  $\beta$ 6-siRNA

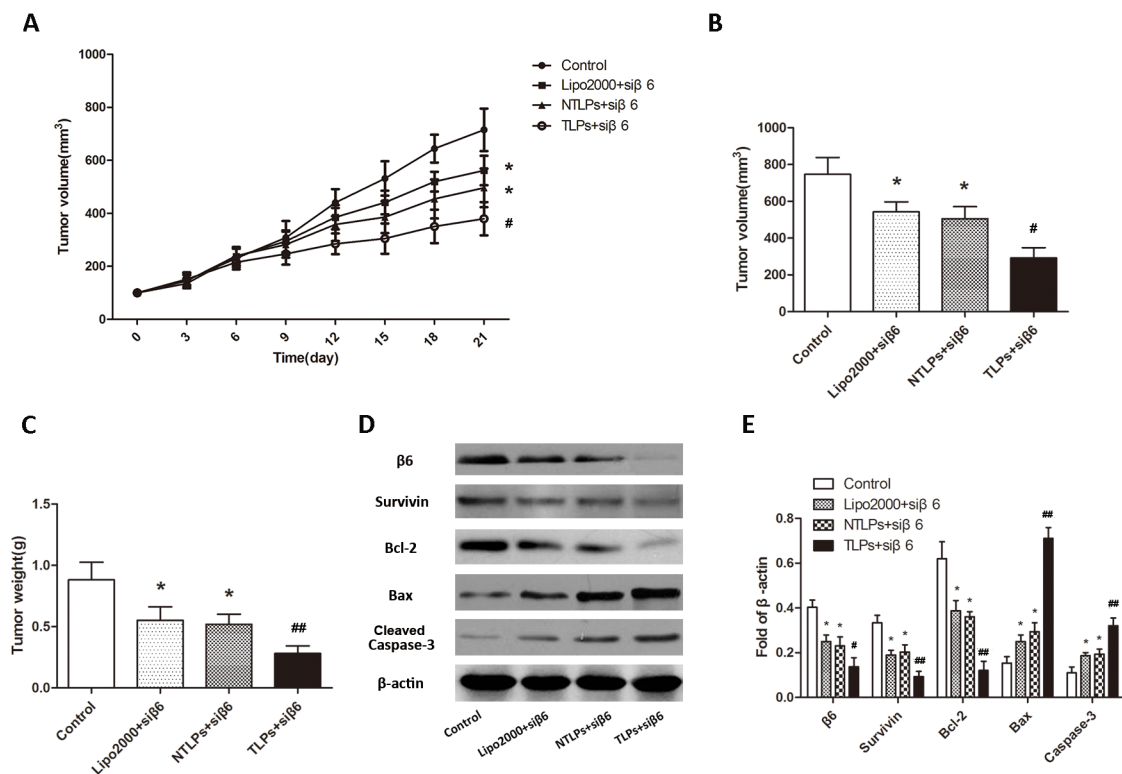

**Figure 7: Anti-tumor efficiency of liposomes in HT-29 tumor-bearing nude mice after intravenous administration with  $\beta$ 6-siRNA loaded Lipo2000, NTLPs and TLPs. A.** Relative tumor volume time curve (n=5), \*P < 0.05 compared with control, # P < 0.05 compared with NTLPs. **B** and **C.** Tumors were also measured and weighed. (n=5), \*P < 0.05 compared with control, # P < 0.05, ## P < 0.05 compared with NTLPs. **D** and **E.** Western blot assays detected the expression of integrin $\beta$ 6 and apoptosis related proteins, such as Survivin, Bcl-2, Bax and cleaved caspase-3 in tumor tissues. (D) Quantification of expression were also showed. The data are expressed as the means  $\pm$  SD of three independent experiments, \* P < 0.05, \*\* P < 0.01 compared with control, # P < 0.05, ## P < 0.01 compared with NTLPs.

TLPs system may represent a potential strategy for the treatment of colon cancer.

## MATERIALS AND METHODS

### Materials

Hydrogenated soy phosphatidylcholine (HSPC) and cholesterol were purchased from Nippon Fine Chemical. Distearylphosphatidylethanolamine (DSPE)-mPEG (2000) and DSPE-PEG (2000)-NH<sub>2</sub> were purchased from Avanti Polar Lipids. The homobifunctional crosslinker bis (sulfosuccinimidyl) suberate (BS3) was from ProteoChem. The monoclonal antibody that detects the extracellular domain of human integrin β6 (E7P6) was prepared and provided as a gift from Michael Agrez (The University of Newcastle, Newcastle, Australia). The cell counting kit-8 (CCK-8) was from Dojindo Molecular Technologies. The Annexin V-FITC/propidium iodide (PI) cell apoptosis assay kit was purchased from Merck Millipore.

Small interference RNA (sense strand: 5'-UUCUCC GAACGUGUCACGUTT-3'; antisense strand: 5'-ACGU GACACGUUCGGAGAATT-3') targeted to the human integrin β6 mRNA was synthesized and purified as described before with HPLC by GenePharma Co. Ltd (Shanghai, China) [17]. FAM-labeled negative control (NC) siRNA (FAM-siRNA) and scramble siRNA were also obtained from GenePharma (Shanghai, China).

### Cell lines

Human colon cancer cell lines HT-29, WiDr and SW480, were obtained from the ATCC. HT-29 and WiDr cells constantly express integrin β6. SW480 cells lack constitutive β6 expression. The cells were maintained as monolayers in medium comprising DMEM (Hyclone) containing 10% heat inactivated FCS (Gibco) and supplemented with 20 mmol/L HEPES, 100 IU/mL penicillin, and 100 mg/mL streptomycin. The cells were incubated in 37°C, 5% CO<sub>2</sub>, and saturated humidity.

### Preparation of siRNA loaded liposomes

The integrinβ6 targeted liposomes (TLPs) were prepared as reported in our previous study with slight modifications. Briefly, HSPC, cholesterol, DSPE-PEG2000 and /DSPE-PEG2000-NH<sub>2</sub> at a molar ratio of 2:1:0.08:0.02 were dissolved in a mixture of chloroform and methanol (9:1 v/v). Then the mixture in a ratio 4:1 (v/v) between organic and aqueous phase was sonicated at room temperature, and the chloroform and methanol were evaporated using a rotary evaporator. The lipid was hydrated with phosphate buffer saline (PBS, pH=7.4). The liposomes were shaken in a vortex to form an aqueous suspension and were subsequently extruded 10 times

through polycarbonate filters with a defined pore size of 400–100 nm. Then integrinβ6-specific antibody E7P6 was coupled to the liposomes. The cross-linker BS3 was added to the liposomes at a final concentration of 5 mmol/L and was incubated for 1 hour at room temperature to activate the liposomes. The excess unreacted cross-linker was removed via ultrafiltration using an Amicon Ultra-0.5 3kD (Millipore). The activated liposomes were collected and incubated with integrinβ6 antibody (E7P6) for 2 hours at room temperature. Finally, 50 mmol/L Tris was added at room temperature for 15 minutes to quench the reaction. The immunoliposomes were separated from the unconjugated antibody using Sepharose CL-4B columns.

Non-targeted liposomes (NTLP) composed of HSPC/Chol/DSPE-PEG2000 at a molar ratio of 2:1:0.1 were prepared with the same method as described above.

The siRNA was dissolved in DEPC-treated water at a final concentration of 20 μM. The liposomes and siRNA solution were mixed under gentle vortexing for 20 seconds and incubated for 20 minutes at room temperature for 30 min to ensure siRNA loading efficiently. The entrapment procedure was performed immediately before use.

### Characterization of liposomes

The transmission electron microscopy (TEM; JEM-100CX II, Japan) was used to observe the morphologies of TLP and NTLP. The mean particle size and zeta-potential values were analyzed by Malvern Zetasizer Nano ZS90.

### siRNA encapsulation efficiency (EE)

The EE of siRNA was determined by ultra-filtrating the FAM-siRNA loaded liposomes using Amicon Ultra-4 centrifugal filter devices (Millipore). After completely ultrafiltration, unencapsulated FAM-siRNA was collected and quantified by using a siRNA calibration line obtained with standard FAM-siRNA solutions. The fluorescence of FAM-siRNA was determined by the spectrofluorometer (Synergy™4, USA) with the excitation and emission wavelengths of 495 and 525 nm. The siRNA EE was calculated from the equation:  $(M_i - M_u) / M_i \times 100\%$ .  $M_u$  and  $M_i$  were defined as the unencapsulated siRNA and totally added siRNA, respectively.

### Serum stability of liposomal siRNA

Serum stability of siRNA in liposomes versus in aqueous solution was determined using agarose gel electrophoresis as described before. Samples of siRNA in aqueous solution or in liposomes were mixed with fresh serum at a 1:1 volume ratio to obtain 50% serum concentration and incubated at 37°C. At different fixed times, aliquots containing 0.25 μg siRNA of each sample were added onto a gel and electrophoresis was performed to visualize intact siRNA.

## In vitro transfection efficiency

The cellular transfection efficiency was examined using a fluorescence microscope. Cells were seeded in 6-well plates. When cells density was up to approximately 50–60%, the medium was replaced with Opti-MEM (Gibco, USA) containing liposomal FAM-siRNA (the final siRNA concentration was 100 nM). The culture medium was replaced by complete medium after 6 hours of incubation. After 24 or 48 hours of treatment, the cellular fluorescence was visualized using a fluorescence microscope (Olympus, Japan). The cells were cultured and treated as described above. After 24 or 48 hours, cells were trypsinized and washed three times with PBS. Then, the cells were collected via centrifugation and were resuspended in 500  $\mu$ l of PBS. Cellular uptake was analyzed by flow cytometry.

## Quantitative real-time PCR

Total RNA was extracted from cells by Trizol (Invitrogen). The reverse transcription reaction was performed using RevertAid™ First Strand cDNA Synthesis Kit (Fermentas), according to the manufacturer's instructions. cDNA obtained from reverse transcription reaction was analyzed by a real-time PCR thermocycler (IQ5 Real-Time PCR cycler; Bio-Rad Laboratories, Hercules, CA, USA) with SsoFast EvaGreen Supermix (Bio-Rad Laboratories). Quantitative values were obtained by the threshold cycle (CT) value. Relative mean fold change in expression ratios was calculated by the  $2^{-\Delta\Delta CT}$  method. Sequences of primers were as follows: integrin  $\beta 6$  (141 bp) forward primer, 5'-AGGATAG TTCT GTTTCCTGC -3',  $\beta 6$  reverse primer 5'-ATCATAGGAATATTTGGAGG -3'.  $\beta$ -actin was used as an internal control.

## Western blotting

Cells were harvested and lysed. Protein samples at a final amount of 20  $\mu$ g were loaded onto an SDS-PAGE gel and electrophoresed. Subsequently, the separated proteins were transferred to nitrocellulose membranes. The membranes were immunoblotted with primary antibody overnight at 4°C followed by HRP(horseradish peroxidase)-labeled secondary antibody. Immunoreactive bands were visualized using ECL method, and the optical density was analyzed with the Image Lab software. Values were expressed as a fold of  $\beta$ -actin.

## Cell viability assay

Cells were seeded in 96-well plates and transfected with TLPs, NTLPs or Lipo2000 entrapping integrin $\beta 6$ -siRNA at a series of concentrations (the final siRNA concentration was 50nM, 100nM and 200 nM) for 6 hours until the fresh culture medium was changed. Cells treated with serum-free medium were used as a control. After

24, 48 and 72 hours, the cell viability was determined using a CCK-8 assay kit according to the manufacturer's instructions. After adding 10 mL CCK-8 to each well, followed by a 2-hour incubation, the absorbance of each sample was measured at a wavelength of 450 nm using a microplate reader (RT-2100C, China).

## Apoptosis assay

Cells were plated in 6-well culture plates ( $1 \times 10^5$  cells/well) and transfected TLPs, NTLPs or Lipo2000 entrapping integrin $\beta 6$ -siRNA (the final siRNA concentration was 100nM). After incubation for 48 hours, cells were harvested, washed in PBS, and resuspended in Annexin V binding buffer. Following the instructions provided by the manufacturer, Annexin V-FITC was added to the cell suspensions and the cells were incubated for 15 minutes at 4°C. Then, PI was added and incubated for 5 minutes at 4°C. The fluorescently labeled cells were tested using a flow cytometer, and the results were analyzed by Flowjo software.

## Transwell assay for cell migration and invasion

Tumor cell migration and invasion ability were analyzed in 24-well Boyden chambers with 8- $\mu$ m pore size polycarbonate membranes (Costar, Acton, USA). For invasion assay, the membranes were precoated with 50  $\mu$ g Matrigel (BD Biosciences, San Diego, USA) to simulate matrix barriers. Cells ( $5 \times 10^5$ /ml) were resuspended in 200  $\mu$ l serum-free medium and placed in the upper chamber, and the lower compartments were filled with 600  $\mu$ l medium with 10% FBS. After incubation (incubation time for migration is 10-12 hours and for invasion is 24 hours), the cells remaining on the upper surface of the membrane were removed. Then the chambers were fixed with methanol for 10 minutes and then stained with crystal violet for 20 minutes. Cells that had invaded through the membrane to the lower filter surface were counted in five random microscopic fields.

## MMP-3 and MMP-9 activity assay

The  $2 \times 10^5$  cells were cultured in a six-well cell culture plate and then transfected with  $\beta 6$ -siRNA loaded in Lipo2000, NTLPs and TLPS for 24 hours. The levels of secreted MMP-3 and MMP-9 in the culture supernatant were collected and subjected to enzyme-linked immune sorbent assay (ELISA) following the manufacturer's guidelines (R&D). Samples were assayed in triplicate and calibrated against a standard curve.

## Tumor growth inhibition study

BALB/C female nude mice were subcutaneously implanted with HT-29 human colon cancer cells at a final concentration of  $1 \times 10^7$ /200  $\mu$ l. Mice with tumor

volumes of approximately 50 mm<sup>3</sup> were selected and randomly assigned to three treatment groups. The β6-siRNA encapsulated in Lipos2000, NTLPs and TLPs were given by intratumoral or intravenous injection twice a week at a β6-siRNA dosage of 0.4 mg/kg. After 3 weeks, the mice were sacrificed and the tumors were dislodged and weighed. The tumor volume was calculated from the following formula:  $(W^2 \times L)/2$ .

## Statistical analysis

Results were presented as the mean ± standard deviation (SD) and all measurements were performed at least three independent experiments. The statistical significance was determined by Mann-Whitney test or Student's t-test.  $P < 0.05$  was considered statistically significant. The statistical analyses were performed using the GraphPad Prism software (GraphPad Software, Inc.).

## CONFLICTS OF INTEREST

No potential conflicts of interest were disclosed.

## GRANT SUPPORT

This study was supported by a research Grant (No. ZR2014HQ020) from the National Natural Sciences Foundation of Shandong Province and research Grant (No. 81173601) from the National Natural Sciences Foundation of China and research Grant (No. J15LL51) from Science and Technology Project of Colleges and Universities in Shandong Province.

## REFERENCES

1. Jemal A, Bray F, Center MM, Ferlay J, Ward E, Forman D. Global cancer statistics. *CA Cancer J Clin*. 2011; 61: 69-90.
2. Gill S, Loprinzi CL, Sargent DJ, Thome SD, Alberts SR, Haller DG, Benedetti J, Francini G, Shepherd LE, Francois Seitz J, Labianca R, Chen W, Cha SS, et al. Pooled analysis of fluorouracil-based adjuvant therapy for stage II and III colon cancer: who benefits and by how much? *J Clin Oncol*. 2004; 22: 1797-1806.
3. Van Cutsem E, Costa F. Progress in the adjuvant treatment of colon cancer: has it influenced clinical practice? *JAMA*. 2005; 294: 2758-2760.
4. Majumder P, Bhunia S, Bhattacharyya J, Chaudhuri A. Inhibiting tumor growth by targeting liposomally encapsulated CDC20siRNA to tumor vasculature: therapeutic RNA interference. *J Control Release*. 2014; 180: 100-108.
5. Aagaard L, Rossi JJ. RNAi therapeutics: principles, prospects and challenges. *Adv Drug Deliv Rev*. 2007; 59: 75-86.
6. Kenny GD, Kamaly N, Kalber TL, Brody LP, Sahuri M, Shamsaei E, Miller AD, Bell JD. Novel multifunctional nanoparticle mediates siRNA tumour delivery, visualisation and therapeutic tumour reduction in vivo. *J Control Release*. 2011; 149: 111-116.
7. Gao J, Sun J, Li H, Liu W, Zhang Y, Li B, Qian W, Wang H, Chen J, Guo Y. Lyophilized HER2-specific PEGylated immunoliposomes for active siRNA gene silencing. *Biomaterials*. 2010; 31: 2655-2664.
8. Dass CR, Choong PF. Selective gene delivery for cancer therapy using cationic liposomes: in vivo proof of applicability. *J Control Release*. 2006; 113: 155-163.
9. Chen CW, Yeh MK, Shiau CY, Chiang CH, Lu DW. Efficient downregulation of VEGF in retinal pigment epithelial cells by integrin ligand-labeled liposome-mediated siRNA delivery. *Int J Nanomedicine*. 2013; 8: 2613-2627.
10. Zheng X, Vladau C, Zhang X, Suzuki M, Ichim TE, Zhang ZX, Li M, Carrier E, Garcia B, Jevnikar AM, Min WP. A novel in vivo siRNA delivery system specifically targeting dendritic cells and silencing CD40 genes for immunomodulation. *Blood*. 2009; 113: 2646-2654.
11. Gao J, Kou G, Wang H, Chen H, Li B, Lu Y, Zhang D, Wang S, Hou S, Qian W, Dai J, Zhao J, Zhong Y, et al. PE38KDEL-loaded anti-HER2 nanoparticles inhibit breast tumor progression with reduced toxicity and immunogenicity. *Breast Cancer Res Treat*. 2009; 115: 29-41.
12. Weinacker A, Chen A, Agrez M, Cone RI, Nishimura S, Wayner E, Pytela R, Sheppard D. Role of the integrin alpha v beta 6 in cell attachment to fibronectin. Heterologous expression of intact and secreted forms of the receptor. *J Biol Chem*. 1994; 269: 6940-6948.
13. Breuss JM, Gallo J, DeLisser HM, Klimanskaya IV, Folkesson HG, Pittet JF, Nishimura SL, Aldape K, Landers DV, Carpenter W. Expression of the beta 6 integrin subunit in development, neoplasia and tissue repair suggests a role in epithelial remodeling. *J Cell Sci*. 1995; 108 ( Pt 6): 2241-2251.
14. Yang GY, Xu KS, Pan ZQ, Zhang ZY, Mi YT, Wang JS, Chen R, Niu J. Integrin alpha v beta 6 mediates the potential for colon cancer cells to colonize in and metastasize to the liver. *Cancer Sci*. 2008; 99: 879-887.
15. Bates RC, Bellovin DI, Brown C, Maynard E, Wu B, Kawakatsu H, Sheppard D, Oettgen P, Mercurio AM. Transcriptional activation of integrin beta6 during the epithelial-mesenchymal transition defines a novel prognostic indicator of aggressive colon carcinoma. *J Clin Invest*. 2005; 115: 339-347.
16. Liu S, Wang J, Niu W, Liu E, Peng C, Lin P, Wang B, Khan AQ, Gao H, Liang B, Shahbaz M, Niu J. The beta6-integrin-ERK/MAP kinase pathway contributes to chemo resistance in colon cancer. *Cancer Lett*. 2013; 328: 325-334.

17. Sun Q, Sun F, Wang B, Liu S, Niu W, Liu E, Peng C, Wang J, Gao H, Liang B, Niu Z, Zou X, Niu J. Interleukin-8 promotes cell migration through integrin alphavbeta6 upregulation in colorectal cancer. *Cancer Lett.* 2014; 354: 245-253.
18. Liang B, Shahbaz M, Wang Y, Gao H, Fang R, Niu Z, Liu S, Wang B, Sun Q, Niu W, Liu E, Wang J, Niu J. Integrinbeta6-targeted immunoliposomes mediate tumor-specific drug delivery and enhance therapeutic efficacy in colon carcinoma. *Clin Cancer Res.* 2015; 21: 1183-1195.
19. Schiffelers RM, Ansari A, Xu J, Zhou Q, Tang Q, Storm G, Molema G, Lu PY, Scaria PV, Woodle MC. Cancer siRNA therapy by tumor selective delivery with ligand-targeted sterically stabilized nanoparticle. *Nucleic Acids Res.* 2004; 32: e149.
20. Ahmed N, Niu J, Dorahy DJ, Gu X, Andrews S, Meldrum CJ, Scott RJ, Baker MS, Macreadie IG, Agrez MV. Direct integrin alphavbeta6-ERK binding: implications for tumour growth. *Oncogene.* 2002; 21: 1370-1380.
21. Wang J, Zhang Z, Xu K, Sun X, Yang G, Niu W, Liu E, Peng C, Lin P, Chen R, Agrez M, Niu J. Suppression of integrin alpha5beta1 by RNA interference in colon cancer cells inhibits extracellular matrix degradation through the MAPK pathway. *Int J Cancer.* 2008; 123: 1311-1317.
22. Niu W, Liu X, Zhang Z, Xu K, Chen R, Liu E, Wang J, Peng C, Niu J. Effects of alphavbeta6 gene silencing by RNA interference in PANC-1 pancreatic carcinoma cells. *Anticancer Res.* 2010; 30: 135-142.
23. Gao H, Peng C, Liang B, Shahbaz M, Liu S, Wang B, Sun Q, Niu Z, Niu W, Liu E, Wang J, Lin P, Niu J. beta6 integrin induces the expression of metalloproteinase-3 and metalloproteinase-9 in colon cancer cells via ERK-ETS1 pathway. *Cancer Lett.* 2014; 354: 427-437.
24. Gu X, Niu J, Dorahy DJ, Scott R, Agrez MV. Integrin alpha(v)beta6-associated ERK2 mediates MMP-9 secretion in colon cancer cells. *Br J Cancer.* 2002; 87: 348-351.
25. Niu J, Dorahy DJ, Gu X, Scott RJ, Draganic B, Ahmed N, Agrez MV. Integrin expression in colon cancer cells is regulated by the cytoplasmic domain of the beta6 integrin subunit. *Int J Cancer.* 2002; 99: 529-537.
26. Wang J, Wu J, Hong J, Chen R, Xu K, Niu W, Peng C, Liu E, Liu S, Agrez M, Niu J. PKC promotes the migration of colon cancer cells by regulating the internalization and recycling of integrin alphavbeta6. *Cancer Lett.* 2011; 311: 38-47.
27. Stetler-Stevenson WG. The role of matrix metalloproteinases in tumor invasion, metastasis, and angiogenesis. *Surg Oncol Clin N Am.* 2001; 10: 383-392, x.
28. Sengupta N, MacDonald TT. The role of matrix metalloproteinases in stromal/epithelial interactions in the gut. *Physiology (Bethesda).* 2007; 22: 401-409.
29. Niu J, Gu X, Turton J, Meldrum C, Howard EW, Agrez M. Integrin-mediated signalling of gelatinase B secretion in colon cancer cells. *Biochem Biophys Res Commun.* 1998; 249: 287-291.
30. Zhang ZY, Xu KS, Wang JS, Yang GY, Wang W, Wang JY, Niu WB, Liu EY, Mi YT, Niu J. Integrin alphavbeta6 acts as a prognostic indicator in gastric carcinoma. *Clin Oncol (R Coll Radiol).* 2008; 20: 61-66.
31. Wang B, Wang W, Niu W, Liu E, Liu X, Wang J, Peng C, Liu S, Xu L, Wang L, Niu J. SDF-1/CXCR4 axis promotes directional migration of colorectal cancer cells through upregulation of integrin alphavbeta6. *Carcinogenesis.* 2014; 35: 282-291.
32. Huang SK, Lee KD, Hong K, Friend DS, Papahadjopoulos D. Microscopic localization of sterically stabilized liposomes in colon carcinoma-bearing mice. *Cancer Res.* 1992; 52: 5135-5143.
